# Supplementary material for: Risk Factors, Prevalence, and Outcomes of Invasive Fungal Disease Post Hematopoietic Cell Transplantation and Cellular Therapies: A Retrospective Monocenter Real-Life Analysis
Source: MDPI journal article supplement (doi:10.3390/cancers15133529), 2023-07-07
Supplement: s1 [file s1]

**Table S1.** Possible IFD in autologous HCT recipients.

| IFD       | Underlying Disease | Localization of Infection | Causative Agent | Outcome  |
|-----------|--------------------|---------------------------|-----------------|----------|
| Patient 1 | HD                 | Lungs                     | Aspergillosis   | Resolved |
| Patient 2 | NHL                | Central catheter          | Candidemia      | Resolved |
| Patient 3 | NHL                | Lungs                     | Aspergillosis   | Resolved |

HCT, hematopoietic cell transplant; IFD, Invasive fungal disease; HD, Hodgkin’s disease; NHL, non-Hodgkin’s lymphoma.
